# Supplementary material for: Delineating Mycobacterium abscessus population structure and transmission employing high-resolution core genome multilocus sequence typing
Source: PubMed Central journal article supplement (PMC9399081; doi:10.1038/s41467-022-32122-5), 2022-08-23
Supplement: 41467_2022_32122_MOESM13_ESM.pdf [file 41467_2022_32122_MOESM13_ESM.pdf]

## Reporting Summary

Nature Portfolio wishes to improve the reproducibility of the work that we publish. This form provides structure for consistency and transparency in reporting. For further information on Nature Portfolio policies, see our [Editorial Policies](#) and the [Editorial Policy Checklist](#).

### Statistics

For all statistical analyses, confirm that the following items are present in the figure legend, table legend, main text, or Methods section.

n/a Confirmed

- The exact sample size ( $n$ ) for each experimental group/condition, given as a discrete number and unit of measurement
- A statement on whether measurements were taken from distinct samples or whether the same sample was measured repeatedly
- The statistical test(s) used AND whether they are one- or two-sided  
*Only common tests should be described solely by name; describe more complex techniques in the Methods section.*
- A description of all covariates tested
- A description of any assumptions or corrections, such as tests of normality and adjustment for multiple comparisons
- A full description of the statistical parameters including central tendency (e.g. means) or other basic estimates (e.g. regression coefficient) AND variation (e.g. standard deviation) or associated estimates of uncertainty (e.g. confidence intervals)
- For null hypothesis testing, the test statistic (e.g.  $F$ ,  $t$ ,  $r$ ) with confidence intervals, effect sizes, degrees of freedom and  $P$  value noted  
*Give  $P$  values as exact values whenever suitable.*
- For Bayesian analysis, information on the choice of priors and Markov chain Monte Carlo settings
- For hierarchical and complex designs, identification of the appropriate level for tests and full reporting of outcomes
- Estimates of effect sizes (e.g. Cohen's  $d$ , Pearson's  $r$ ), indicating how they were calculated

*Our web collection on [statistics for biologists](#) contains articles on many of the points above.*

### Software and code

Policy information about [availability of computer code](#)

|                 |                                                                                                                                                                                                                                                                                                                                                                                                                                                                                                                                                                                                                                                                                                              |
|-----------------|--------------------------------------------------------------------------------------------------------------------------------------------------------------------------------------------------------------------------------------------------------------------------------------------------------------------------------------------------------------------------------------------------------------------------------------------------------------------------------------------------------------------------------------------------------------------------------------------------------------------------------------------------------------------------------------------------------------|
| Data collection | Genome assemblies were downloaded directly from <a href="https://www.ncbi.nlm.nih.gov/assembly">https://www.ncbi.nlm.nih.gov/assembly</a> . FastQ files were downloaded from SRA using fastq-dump.2.8.2 and GNU parallel v. 20161222                                                                                                                                                                                                                                                                                                                                                                                                                                                                         |
| Data analysis   | Assemblies were made using shovill v1.1.0, (skesa v2.4.0 + SPAdes v3.15.0; trimmomatic v0.39) or SeqSphere+ v7.7.5. CgMLST scheme creation (cgMLST target definer v1.5) and analysis was performed in SeqSphere+ v7.7.5. Gene extraction was performed in BioNumerics v7.6 and cgSNP analysis with MTBseq v1.0.4. Bash scripts used for this study are available at <a href="https://github.com/ngs-fzb/NTMtools">https://github.com/ngs-fzb/NTMtools</a> , but include only publicly available tools. The cgMLST scheme is publicly available at <a href="https://www.cgmlst.org">cgmlst.org</a> ( <a href="https://www.cgmlst.org/ncs/schema/22602285/">https://www.cgmlst.org/ncs/schema/22602285/</a> ). |

For manuscripts utilizing custom algorithms or software that are central to the research but not yet described in published literature, software must be made available to editors and reviewers. We strongly encourage code deposition in a community repository (e.g. GitHub). See the Nature Portfolio [guidelines for submitting code & software](#) for further information.

## Data

Policy information about [availability of data](#)

All manuscripts must include a [data availability statement](#). This statement should provide the following information, where applicable:

- Accession codes, unique identifiers, or web links for publicly available datasets
- A description of any restrictions on data availability
- For clinical datasets or third party data, please ensure that the statement adheres to our [policy](#)

Accession numbers of all whole genome sequencing datasets analyzed in this study are listed in Supplementary Table 1 and 3. The cgMLST scheme is publicly available at cgmlst.org (<https://www.cgmlst.org/ncs/schema/22602285/>).

## Human research participants

Policy information about [studies involving human research participants and Sex and Gender in Research](#).

|                             |                                                                                |
|-----------------------------|--------------------------------------------------------------------------------|
| Reporting on sex and gender | <input type="text" value="No human participants were involved in this study"/> |
| Population characteristics  | <input type="text" value="No human participants were involved in this study"/> |
| Recruitment                 | <input type="text" value="No human participants were involved in this study"/> |
| Ethics oversight            | <input type="text" value="No human participants were involved in this study"/> |

Note that full information on the approval of the study protocol must also be provided in the manuscript.

## Field-specific reporting

Please select the one below that is the best fit for your research. If you are not sure, read the appropriate sections before making your selection.

Life sciences     Behavioural & social sciences     Ecological, evolutionary & environmental sciences

For a reference copy of the document with all sections, see [nature.com/documents/nr-reporting-summary-flat.pdf](https://www.nature.com/documents/nr-reporting-summary-flat.pdf)

## Life sciences study design

All studies must disclose on these points even when the disclosure is negative.

|                 |                                                                                                                                                                                                                                                                                                                                                                        |
|-----------------|------------------------------------------------------------------------------------------------------------------------------------------------------------------------------------------------------------------------------------------------------------------------------------------------------------------------------------------------------------------------|
| Sample size     | <input type="text" value="For this study, we downloaded assemblies (fastA files) from the NCBI/RefSeq Assembly database for 1,797 isolates (Supplementary Table 1) and Illumina paired-end read datasets (fastQ files) from the sequence read archive (SRA) for 372 isolates (Supplementary Table 3). The total dataset (n=2,169) comprised 1991 unique biosamples."/> |
| Data exclusions | <input type="text" value="Initially, All assemblies with more than 300 contigs (n=13) were removed from further analysis."/>                                                                                                                                                                                                                                           |
| Replication     | <input type="text" value="For technical validation, we used same read sets of 30 isolates and created different assemblies with different algorithms. Allele numbers did not differ between these replicates."/>                                                                                                                                                       |
| Randomization   | <input type="text" value="Samples were allocated into experimental groups (e.g. extra-pulmonary vs pulmonary outbreaks) according to the metadata that was available for these samples."/>                                                                                                                                                                             |
| Blinding        | <input type="text" value="This is not applicable as the associated metadata unambiguously resulted in the allocation of the samples within a specific group."/>                                                                                                                                                                                                        |

## Behavioural & social sciences study design

All studies must disclose on these points even when the disclosure is negative.

|                   |                                             |
|-------------------|---------------------------------------------|
| Study description | <input type="text" value="Not applicable"/> |
|-------------------|---------------------------------------------|

|                   |                |
|-------------------|----------------|
| Research sample   | Not applicable |
| Sampling strategy | Not applicable |
| Data collection   | Not applicable |
| Timing            | Not applicable |
| Data exclusions   | Not applicable |
| Non-participation | Not applicable |
| Randomization     | Not applicable |

## Ecological, evolutionary & environmental sciences study design

All studies must disclose on these points even when the disclosure is negative.

|                          |                |
|--------------------------|----------------|
| Study description        | Not applicable |
| Research sample          | Not applicable |
| Sampling strategy        | Not applicable |
| Data collection          | Not applicable |
| Timing and spatial scale | Not applicable |
| Data exclusions          | Not applicable |
| Reproducibility          | Not applicable |
| Randomization            | Not applicable |
| Blinding                 | Not applicable |

Did the study involve field work?  Yes  No

## Field work, collection and transport

|                        |                |
|------------------------|----------------|
| Field conditions       | Not applicable |
| Location               | Not applicable |
| Access & import/export | Not applicable |
| Disturbance            | Not applicable |

## Reporting for specific materials, systems and methods

We require information from authors about some types of materials, experimental systems and methods used in many studies. Here, indicate whether each material, system or method listed is relevant to your study. If you are not sure if a list item applies to your research, read the appropriate section before selecting a response.

## Materials &amp; experimental systems

|                                     |                                                        |
|-------------------------------------|--------------------------------------------------------|
| n/a                                 | Included in the study                                  |
| <input checked="" type="checkbox"/> | <input type="checkbox"/> Antibodies                    |
| <input checked="" type="checkbox"/> | <input type="checkbox"/> Eukaryotic cell lines         |
| <input checked="" type="checkbox"/> | <input type="checkbox"/> Palaeontology and archaeology |
| <input checked="" type="checkbox"/> | <input type="checkbox"/> Animals and other organisms   |
| <input checked="" type="checkbox"/> | <input type="checkbox"/> Clinical data                 |
| <input checked="" type="checkbox"/> | <input type="checkbox"/> Dual use research of concern  |

## Methods

|                                     |                                                 |
|-------------------------------------|-------------------------------------------------|
| n/a                                 | Included in the study                           |
| <input checked="" type="checkbox"/> | <input type="checkbox"/> ChIP-seq               |
| <input checked="" type="checkbox"/> | <input type="checkbox"/> Flow cytometry         |
| <input checked="" type="checkbox"/> | <input type="checkbox"/> MRI-based neuroimaging |

## Antibodies

|                 |                |
|-----------------|----------------|
| Antibodies used | Not applicable |
| Validation      | Not applicable |

## Eukaryotic cell lines

Policy information about [cell lines and Sex and Gender in Research](#)

|                                                                      |                |
|----------------------------------------------------------------------|----------------|
| Cell line source(s)                                                  | Not applicable |
| Authentication                                                       | Not applicable |
| Mycoplasma contamination                                             | Not applicable |
| Commonly misidentified lines<br>(See <a href="#">ICLAC</a> register) | Not applicable |

## Palaeontology and Archaeology

|                                                                                                                                                 |                |
|-------------------------------------------------------------------------------------------------------------------------------------------------|----------------|
| Specimen provenance                                                                                                                             | Not applicable |
| Specimen deposition                                                                                                                             | Not applicable |
| Dating methods                                                                                                                                  | Not applicable |
| <input type="checkbox"/> Tick this box to confirm that the raw and calibrated dates are available in the paper or in Supplementary Information. |                |
| Ethics oversight                                                                                                                                | Not applicable |

Note that full information on the approval of the study protocol must also be provided in the manuscript.

## Animals and other research organisms

Policy information about [studies involving animals; ARRIVE guidelines](#) recommended for reporting animal research, and [Sex and Gender in Research](#)

|                         |                |
|-------------------------|----------------|
| Laboratory animals      | Not applicable |
| Wild animals            | Not applicable |
| Reporting on sex        | Not applicable |
| Field-collected samples | Not applicable |
| Ethics oversight        | Not applicable |

Note that full information on the approval of the study protocol must also be provided in the manuscript.

## Clinical data

Policy information about [clinical studies](#)

All manuscripts should comply with the ICMJE [guidelines for publication of clinical research](#) and a completed [CONSORT checklist](#) must be included with all submissions.

|                             |                                             |
|-----------------------------|---------------------------------------------|
| Clinical trial registration | <input type="text" value="Not applicable"/> |
| Study protocol              | <input type="text" value="Not applicable"/> |
| Data collection             | <input type="text" value="Not applicable"/> |
| Outcomes                    | <input type="text" value="Not applicable"/> |

## Dual use research of concern

Policy information about [dual use research of concern](#)

### Hazards

Could the accidental, deliberate or reckless misuse of agents or technologies generated in the work, or the application of information presented in the manuscript, pose a threat to:

| No                                  | Yes                                                 |
|-------------------------------------|-----------------------------------------------------|
| <input checked="" type="checkbox"/> | <input type="checkbox"/> Public health              |
| <input checked="" type="checkbox"/> | <input type="checkbox"/> National security          |
| <input checked="" type="checkbox"/> | <input type="checkbox"/> Crops and/or livestock     |
| <input checked="" type="checkbox"/> | <input type="checkbox"/> Ecosystems                 |
| <input checked="" type="checkbox"/> | <input type="checkbox"/> Any other significant area |

### Experiments of concern

Does the work involve any of these experiments of concern:

| No                                  | Yes                                                                                                  |
|-------------------------------------|------------------------------------------------------------------------------------------------------|
| <input checked="" type="checkbox"/> | <input type="checkbox"/> Demonstrate how to render a vaccine ineffective                             |
| <input checked="" type="checkbox"/> | <input type="checkbox"/> Confer resistance to therapeutically useful antibiotics or antiviral agents |
| <input checked="" type="checkbox"/> | <input type="checkbox"/> Enhance the virulence of a pathogen or render a nonpathogen virulent        |
| <input checked="" type="checkbox"/> | <input type="checkbox"/> Increase transmissibility of a pathogen                                     |
| <input checked="" type="checkbox"/> | <input type="checkbox"/> Alter the host range of a pathogen                                          |
| <input checked="" type="checkbox"/> | <input type="checkbox"/> Enable evasion of diagnostic/detection modalities                           |
| <input checked="" type="checkbox"/> | <input type="checkbox"/> Enable the weaponization of a biological agent or toxin                     |
| <input checked="" type="checkbox"/> | <input type="checkbox"/> Any other potentially harmful combination of experiments and agents         |

## ChIP-seq

### Data deposition

Confirm that both raw and final processed data have been deposited in a public database such as [GEO](#).

Confirm that you have deposited or provided access to graph files (e.g. BED files) for the called peaks.

|                                                                    |                                             |
|--------------------------------------------------------------------|---------------------------------------------|
| Data access links<br><i>May remain private before publication.</i> | <input type="text" value="Not applicable"/> |
| Files in database submission                                       | <input type="text" value="Not applicable"/> |
| Genome browser session<br>(e.g. <a href="#">UCSC</a> )             | <input type="text" value="Not applicable"/> |

### Methodology

|                  |                                             |
|------------------|---------------------------------------------|
| Replicates       | <input type="text" value="Not applicable"/> |
| Sequencing depth | <input type="text" value="Not applicable"/> |

|                         |                |
|-------------------------|----------------|
| Antibodies              | Not applicable |
| Peak calling parameters | Not applicable |
| Data quality            | Not applicable |
| Software                | Not applicable |

## Flow Cytometry

### Plots

Confirm that:

- The axis labels state the marker and fluorochrome used (e.g. CD4-FITC).
- The axis scales are clearly visible. Include numbers along axes only for bottom left plot of group (a 'group' is an analysis of identical markers).
- All plots are contour plots with outliers or pseudocolor plots.
- A numerical value for number of cells or percentage (with statistics) is provided.

### Methodology

|                           |                |
|---------------------------|----------------|
| Sample preparation        | Not applicable |
| Instrument                | Not applicable |
| Software                  | Not applicable |
| Cell population abundance | Not applicable |
| Gating strategy           | Not applicable |

- Tick this box to confirm that a figure exemplifying the gating strategy is provided in the Supplementary Information.

## Magnetic resonance imaging

### Experimental design

|                                 |                |
|---------------------------------|----------------|
| Design type                     | Not applicable |
| Design specifications           | Not applicable |
| Behavioral performance measures | Not applicable |

### Acquisition

|                               |                                                                            |
|-------------------------------|----------------------------------------------------------------------------|
| Imaging type(s)               | Not applicable                                                             |
| Field strength                | Not applicable                                                             |
| Sequence & imaging parameters | Not applicable                                                             |
| Area of acquisition           | Not applicable                                                             |
| Diffusion MRI                 | <input type="checkbox"/> Used <input checked="" type="checkbox"/> Not used |

### Preprocessing

|                            |                |
|----------------------------|----------------|
| Preprocessing software     | Not applicable |
| Normalization              | Not applicable |
| Normalization template     | Not applicable |
| Noise and artifact removal | Not applicable |
| Volume censoring           | Not applicable |

## Statistical modeling & inference

|                                                                           |                                                                                                       |
|---------------------------------------------------------------------------|-------------------------------------------------------------------------------------------------------|
| Model type and settings                                                   | <input type="text" value="Not applicable"/>                                                           |
| Effect(s) tested                                                          | <input type="text" value="Not applicable"/>                                                           |
| Specify type of analysis:                                                 | <input type="checkbox"/> Whole brain <input type="checkbox"/> ROI-based <input type="checkbox"/> Both |
| Statistic type for inference<br>(See <a href="#">Eklund et al. 2016</a> ) | <input type="text" value="Not applicable"/>                                                           |
| Correction                                                                | <input type="text" value="Not applicable"/>                                                           |

## Models & analysis

|                                               |                                                                       |
|-----------------------------------------------|-----------------------------------------------------------------------|
| n/a                                           | Involvement in the study                                              |
| <input checked="" type="checkbox"/>           | <input type="checkbox"/> Functional and/or effective connectivity     |
| <input checked="" type="checkbox"/>           | <input type="checkbox"/> Graph analysis                               |
| <input checked="" type="checkbox"/>           | <input type="checkbox"/> Multivariate modeling or predictive analysis |
| Functional and/or effective connectivity      | <input type="text" value="Not applicable"/>                           |
| Graph analysis                                | <input type="text" value="Not applicable"/>                           |
| Multivariate modeling and predictive analysis | <input type="text" value="Not applicable"/>                           |
